# Supplementary material
Source: ML conference proceedings conference paper supplement (https://openreview.net/forum?id=55e5f3GVFc)
Supplement: supplementary_material [file GeoBPE-logged-runs.pdf › GeoBPE-logged-runs.pdf]

| data_dir         | toy                  | bin_strategy | glue_opt | free_bonds | glue_opt_prior | glue_opt_every | max_num_struct_bins                                                | num_p                          | K | L     | initial_rmsd | initial_lddt | bpr          | latest_K    | latest_L | latest_bpr  | latest_lddt  | latest_rmsd  | perplexity  | use_ratio   |              |
|------------------|----------------------|--------------|----------|------------|----------------|----------------|--------------------------------------------------------------------|--------------------------------|---|-------|--------------|--------------|--------------|-------------|----------|-------------|--------------|--------------|-------------|-------------|--------------|
| atlas            | 0 histogram-cover    | TRUE         | FALSE    | FALSE      | 0              | 10             | 5000 (1:500)                                                       | (2: 2, 3: 5, 5: 1, 6: 2, 8: 1) |   | 7     | 212.997143   | 4.697910274  | 0.5090282228 | 19.66457268 | 604      | 16.6435361  | 27.81656374  | 0.4964254682 | 5.496006068 | 22.87911987 | 0.5923566818 |
| bindbio          | 0 histogram-cover    | TRUE         | FALSE    | FALSE      | 0              | 10             | 5000 (1:50)                                                        | (2: 2, 3: 5, 5: 1, 6: 2, 8: 1) |   | 7     | 261.8186651  | 6.574970391  | 0.4487628716 | 19.67455242 | 583      | 181.6805932 | 26.13242262  | 0.4535774556 | 7.602849618 | 19.582901   | 0.8535031676 |
| bindint          | 0 histogram-cover    | TRUE         | FALSE    | FALSE      | 0              | 10             | 5000 (1:50)                                                        | (2: 2, 3: 5, 5: 1, 6: 2, 8: 1) |   | 7     | 177.6555863  | 4.667739963  | 0.4484853517 | 19.64661166 | 967      | 118.8167128 | 28.55201382  | 0.4538388798 | 5.93877568  | 19.37830734 | 0.8535031676 |
| bindshake        | 0 histogram-cover    | TRUE         | FALSE    | FALSE      | 0              | 10             | 5000 (1:50)                                                        | (2: 2, 3: 5, 5: 1, 6: 2, 8: 1) |   | 7     | 279.3089569  | 5.960832853  | 0.4528320801 | 19.68064213 | 588      | 190.189903  | 26.89750185  | 0.450328849  | 6.972887719 | 19.44424629 | 0.8407643437 |
| catbio           | 0 histogram-cover    | TRUE         | FALSE    | FALSE      | 0              | 10             | 5000 (1:50)                                                        | (2: 2, 3: 5, 5: 1, 6: 2, 8: 1) |   | 7     | 332.2374915  | 8.023492392  | 0.4034112584 | 19.68874626 | 590      | 219.2938646 | 26.35467337  | 0.4124713836 | 9.398158644 | 19.06841469 | 0.8662420511 |
| catint           | 0 histogram-cover    | TRUE         | FALSE    | FALSE      | 0              | 10             | 5000 (1:50)                                                        | (2: 2, 3: 5, 5: 1, 6: 2, 8: 1) |   | 7     | 252.0105335  | 7.404551914  | 0.3720029693 | 19.6727843  | 575      | 173.9100069 | 26.37616583  | 0.4924836755 | 9.058779251 | 18.5705452  | 0.8407643437 |
| conserved        | 0 histogram-cover    | TRUE         | FALSE    | FALSE      | 0              | 10             | 5000 (1:50)                                                        | (2: 2, 3: 5, 5: 1, 6: 2, 8: 1) |   | 7     | 228.9305305  | 5.197558353  | 0.4737664289 | 19.66544164 | 581      | 158.8407516 | 26.17835185  | 0.4581337451 | 6.523165002 | 19.38758087 | 0.8407643437 |
| ept              | 0 histogram-cover    | TRUE         | FALSE    | FALSE      | 0              | 10             | 5000 (1:50)                                                        | (2: 2, 3: 5, 5: 1, 6: 2, 8: 1) |   | 7     | 235.6634615  | 5.94924629   | 0.4715113499 | 19.71408024 | 576      | 158.3942308 | 43.30874889  | 0.4675215062 | 6.96117416  | 19.8272658  | 0.7643312216 |
| homo             | 0 histogram-cover    | TRUE         | FALSE    | FALSE      | 0              | 10             | 5000 (1:50)                                                        | (2: 2, 3: 5, 5: 1, 6: 2, 8: 1) |   | 7     | 226.4660738  | 5.341724453  | 0.4684203296 | 19.66499699 | 598      | 156.3955863 | 26.35053681  | 0.469633419  | 5.772015533 | 19.89270973 | 0.8471337557 |
| repeat           | 0 histogram-cover    | TRUE         | FALSE    | FALSE      | 0              | 10             | 5000 (1:50)                                                        | (2: 2, 3: 5, 5: 1, 6: 2, 8: 1) |   | 7     | 251.7619048  | 5.641388788  | 0.4807823154 | 19.67586143 | 588      | 173.9606227 | 27.54290478  | 0.4892312906 | 6.075811955 | 19.77686051 | 0.8535031676 |
| pretrain         | 0 histogram          | FALSE        | TRUE     | 0          | 0              | 5000 (1:500)   | (2: 100, 3: 500)                                                   |                                |   | 600   | 228.8640268  | 4.387204122  | 0.6927058898 | 36.02222013 | 972      | 228.8552895 | 36.74116335  | 0.6927058898 | 4.387204122 | 321.2348328 | 0.9980952144 |
| pretrain         | 0 histogram          | FALSE        | TRUE     | 0          | 0              | 5000 (1:1000)  | (2: 200, 3: 1000)                                                  |                                |   | 1200  | 228.8640268  | 3.886160519  | 0.725866201  | 40.02268597 | 1300     | 228.8618204 | 40.022686201 | 0.725866201  | 3.886160519 | 640.2530518 | 0.9940476418 |
| pretrain         | 0 histogram          | FALSE        | TRUE     | 0          | 0              | 10000 (1:5000) | (2: 1000, 3: 5000)                                                 |                                |   | 6000  | 228.8640268  | 3.151449091  | 0.7822988194 | 49.38855446 |          |             |              |              |             | 3197.411865 | 0.9630476236 |
| pretrain         | 0 histogram          | FALSE        | TRUE     | 1          | 10             | 5000 (1:500)   | (2: 100, 3: 500, 5: 20, 6: 100, 8: 5, 9: 20, 11: 1, 12: 5, 14: 1)  |                                |   | 600   | 228.8640268  | 4.387204122  | 0.6927058898 | 36.02222013 | 1650     | 228.8255178 | 37.54618359  | 0.6927058898 | 4.387204122 | 321.2348328 | 0.9980952144 |
| pretrain         | 0 histogram          | TRUE         | TRUE     | 1          | 10             | 5000 (1:50)    | (2: 100, 3: 500, 5: 20, 6: 100, 8: 5, 9: 20, 11: 1, 12: 5, 14: 1)  |                                |   | 700   | 228.8449929  | 26.32853834  | 0.5807416713 | 3.936125003 |          |             |              |              |             |             |              |
| pretrain         | 0 histogram          | TRUE         | TRUE     | 1          | 10             | 5000 (1:500)   | (2: 100, 3: 500, 5: 20, 6: 100, 8: 5, 9: 20, 11: 1, 12: 5, 14: 1)  |                                |   | 600   | 228.8640268  | 1.656926385  | 0.729722218  | 36.02222013 | 1554     | 228.8361968 | 37.45402879  | 0.729722218  | 1.656926385 | 336.0029907 | 0.9980952144 |
| pretrain         | 0 histogram          | TRUE         | TRUE     | 1          | 10             | 5000 (1:1000)  | (2: 500, 3: 2000, 5: 100, 6: 500, 8: 20, 9: 100, 11: 5, 12: 20)    |                                |   | 2500  | 228.8640268  | 1.414444334  | 0.7508450139 | 41.10996177 | 2753     | 228.8566427 | 41.26464653  | 0.7508450139 | 1.414444334 | 794.567749  | 0.9963636398 |
| pretrain         | 0 histogram          | TRUE         | TRUE     | 1          | 10             | 5000 (1:2000)  | (2: 1000, 3: 5000, 5: 200, 6: 1000, 8: 50, 9: 200, 11: 20, 12: 20) |                                |   | 6000  | 228.8640268  | 1.37273265   | 0.7560054117 | 45.44009873 |          |             |              |              |             | 1684.145752 | 0.9909999967 |
| pretrain         | 0 histogram          | TRUE         | TRUE     | 1          | 10             | 20000 (1:2000) | (2: 1000, 3: 20000)                                                |                                |   | 21000 | 228.8640268  | 1.212136861  | 0.7648766102 | 47.61765477 |          |             |              |              |             | 2384.68335  | 0.995666827  |
| pretrain         | 0 histogram          | TRUE         | TRUE     | 1          | 10             | 20000 (1:5000) | (2: 1000, 3: 5000)                                                 |                                |   | 6000  | 228.8640268  | 1.39597686   | 0.75284706   | 49.38855446 |          |             |              |              |             | 3340.106934 | 0.961904831  |
| pretrain         | 0 histogram-cover    | FALSE        | TRUE     | 0          | 0              | 5000 (1:300)   | (2: 50, 5: 20, 6: 100, 8: 5, 9: 20, 11: 1, 12: 5, 14: 1)           |                                |   | 20100 | 227.5904919  | 40.12001009  | 0.5727702137 | 5.786398862 |          |             |              |              |             |             |              |
| pretrain         | 0 histogram-cover    | TRUE         | FALSE    | 0          | 10             | 5000 (1:50)    | (2: 2, 3: 5, 5: 1, 6: 2, 8: 1)                                     |                                |   | 780   | 149.6838668  | 26.50057502  | 0.4501544836 | 5.17185171  |          |             |              |              |             |             |              |
| pretrain         | 0 histogram-cover    | TRUE         | TRUE     | 0          | 10             | 5000 (1:100)   | (2: 2, 3: 5, 5: 1, 6: 2, 8: 1)                                     |                                |   | 409   | 188.6846023  | 28.53215619  | 0.4950649537 | 5.17185171  |          |             |              |              |             |             |              |
| pretrain         | 0 histogram-cover    | TRUE         | TRUE     | 0          | 10             | 5000 (1:300)   | (2: 1)                                                             |                                |   | 3     | 228.6257355  | 26.1635398   | 0.3174543608 | 7.389412666 |          |             |              |              |             |             |              |
| pretrain         | 0 histogram-cover    | TRUE         | TRUE     | 0          | 10             | 5000 (1:300)   | (2: 2, 3: 5, 5: 1, 6: 2, 8: 1)                                     |                                |   | 9     | 228.7522358  | 27.74873481  | 0.49330647   | 4.623508544 |          |             |              |              |             |             |              |
| pretrain         | 0 histogram-cover    | TRUE         | TRUE     | 0          | 10             | 5000 (1:300)   | (2: 2, 3: 5, 5: 1, 6: 2, 8: 1)                                     |                                |   |       |              |              |              |             |          |             |              |              |             |             |              |
| pretrain         | 0 histogram-cover    | TRUE         | TRUE     | 0          | 10             | 5000 (1:300)   | (2: 2, 3: 20, 5: 1, 6: 2, 8: 1)                                    |                                |   |       |              |              |              |             |          |             |              |              |             |             |              |
| pretrain         | 0 histogram-cover    | TRUE         | TRUE     | 0          | 10             | 5000 (1:300)   | (2: 10, 3: 50, 5: 1, 6: 5, 8: 1)                                   |                                |   | 24    | 228.8450518  | 29.1641862   | 0.6333041673 | 2.239086045 |          |             |              |              |             |             |              |
| pretrain         | 0 histogram-cover    | TRUE         | TRUE     | 0          | 10             | 5000 (1:300)   | (2: 10, 3: 50, 5: 1, 6: 5, 8: 1)                                   |                                |   | 65    | 228.8526418  | 30.60261934  | 0.6845052607 | 1.81623791  |          |             |              |              |             |             |              |
| pretrain         | 0 histogram-cover    | TRUE         | TRUE     | 0          | 10             | 5000 (1:300)   | (2: 50, 5: 20, 6: 100, 8: 5, 9: 20, 11: 1, 12: 5, 14: 1)           |                                |   | 5200  | 228.534567   | 37.23970995  | 0.6750034882 | 2.114771369 |          |             |              |              |             |             |              |
| pretrain         | 0 histogram-cover    | TRUE         | TRUE     | 0          | 10             | 5000 (1:300)   | (2: 100, 3: 500, 5: 20, 6: 100, 8: 5, 9: 20, 11: 1, 12: 5, 14: 1)  |                                |   |       |              |              |              |             |          |             |              |              |             |             |              |
| pretrain         | 0 histogram-cover    | TRUE         | TRUE     | 0          | 10             | 5000 (1:500)   | (2: 100, 3: 500, 5: 20, 6: 100, 8: 5, 9: 20, 11: 1, 12: 5, 14: 1)  |                                |   |       |              |              |              |             |          |             |              |              |             |             |              |
| pretrain         | 0 uniform            | TRUE         | TRUE     | 0          | 10             | 5000 (1:500)   | (2: 100, 3: 500, 5: 20, 6: 100, 8: 5, 9: 20, 11: 1, 12: 5, 14: 1)  |                                |   |       |              |              |              |             |          |             |              |              |             |             |              |
| pretrain         | 0 uniform            | TRUE         | TRUE     | 0          | 10             | 5000 (1:500)   | (2: 100, 3: 500, 5: 20, 6: 100, 8: 5, 9: 20, 11: 1, 12: 5, 14: 1)  |                                |   |       |              |              |              |             |          |             |              |              |             |             |              |
| pretrain         | 300 histogram-cover  | TRUE         | FALSE    | 0          | 0              | 5000 (1:50)    | (2: 2, 3: 5, 5: 1, 6: 2, 8: 1)                                     |                                |   | 698   | 228.8612615  | 36.24653011  | 0.6088041408 | 6.815893654 |          |             |              |              |             |             |              |
| pretrain         | 300 histogram-cover  | TRUE         | FALSE    | 0          | 10             | 5000 (1:50)    | (2: 2, 3: 5, 5: 1, 6: 2, 8: 1)                                     |                                |   | 1981  | 134.3345324  | 54.25554649  | 0.4930624242 | 7.251373824 |          |             |              |              |             |             |              |
| pretrain         | 300 histogram-cover  | TRUE         | TRUE     | 0          | 1              | 5000 (1:100)   | (2: 2, 3: 5, 5: 1, 6: 2, 8: 1)                                     |                                |   | 1981  | 134.3345324  | 54.25554649  | 0.4930624242 | 7.251373824 |          |             |              |              |             |             |              |
| pretrain         | 300 histogram-cover  | TRUE         | TRUE     | 0          | 10             | 5000 (1:50)    | (2: 2, 3: 5, 5: 1, 6: 2, 8: 1)                                     |                                |   | 707   | 162.7697842  | 35.93496264  | 0.5299156411 | 4.504176401 |          |             |              |              |             |             |              |
| pretrain         | 300 histogram-cover  | TRUE         | TRUE     | 0          | 10             | 5000 (1:100)   | (2: 2, 3: 5, 5: 1, 6: 2, 8: 1)                                     |                                |   | 1982  | 134.6906475  | 54.22242407  | 0.4894372258 | 7.003588502 |          |             |              |              |             |             |              |
| pretrain         | 300 histogram-cover  | TRUE         | TRUE     | 0          | 10             | 5000 (1:300)   | (2: 2, 3: 5, 5: 1, 6: 2, 8: 1)                                     |                                |   | 6709  | 138.7769784  | 251.503249   | 0.5198669556 | 6.385731716 |          |             |              |              |             |             |              |
| pretrain         | 300 histogram-cover  | TRUE         | TRUE     | 0          | 10             | 5000 (1:300)   | (2: 1)                                                             |                                |   | 3     | 228.6257355  | 26.1635398   | 0.3174543608 | 7.389412666 |          |             |              |              |             |             |              |
| pretrain         | 300 histogram-cover  | TRUE         | TRUE     | 0          | 10             | 5000 (1:300)   | (2: 2, 3: 5, 5: 1, 6: 2, 8: 1)                                     |                                |   | 2309  | 198.9208633  | 55.73743195  | 0.5672642231 | 3.554453159 |          |             |              |              |             |             |              |
| pretrain         | 300 histogram-cover  | TRUE         | TRUE     | 0          | 10             | 5000 (1:300)   | (2: 10, 3: 50, 5: 1, 6: 5, 8: 1)                                   |                                |   | 845   | 222.2230216  | 40.56836822  | 0.69296629   | 1.725974273 |          |             |              |              |             |             |              |
| pretrain         | 3000 histogram-cover | TRUE         | TRUE     | 0          | 0              | 5000 (1:300)   | (2: 10, 3: 50, 5: 1, 6: 5, 8: 1)                                   |                                |   | 65    | 227.4975317  | 30.62039814  | 0.7164718146 | 1.629448837 |          |             |              |              |             |             |              |
| Main experiments |                      |              |          |            |                |                |                                                                    |                                |   |       |              |              |              |             |          |             |              |              |             |             |              |
| Used in paper    |                      |              |          |            |                |                |                                                                    |                                |   |       |              |              |              |             |          |             |              |              |             |             |              |
